# Supplementary material for: Association of Mediterranean Diet With Cognitive Decline Among Diverse Hispanic or Latino Adults From the Hispanic Community Health Study/Study of Latinos
Source: PubMed Central journal article supplement (PMC9284337; doi:10.1001/jamanetworkopen.2022.21982), 2022-07-14
Supplement: jamanetwopen-e2221982-s001.pdf [file jamanetwopen-e2221982-s001.pdf]

## Supplemental Online Content

Moustafa B, Trifan G, Isasi CR, et al. Association of Mediterranean diet with cognitive decline among diverse Hispanic or Latino adults from the Hispanic Community Health Study/Study of Latinos. *JAMA Netw Open*. 2022;5(7):e2221982.  
doi:10.1001/jamanetworkopen.2022.21982

**eTable 1.** Frequency of Hispanic/Latino Adults for Each Intake Category at Visit 1 Using the Mediterranean Diet Score and the Modified Mediterranean Diet Score (N=6321)

**eTable 2.** Characteristics of Hispanic or Latino Adults at Visit 1 by Modified Mediterranean Diet Adherence

**eTable 3.** Association of Modified Mediterranean Diet Score With Cognitive Performance at Visit 1

**eTable 4.** Association of Modified Mediterranean Diet Score With Cognitive Performance at Visit 2

**eTable 5.** Cognitive Performance Change Between Visits 1 and 2 by Modified Mediterranean Diet Adherence

This supplemental material has been provided by the authors to give readers additional information about their work.

**eTable 1.** Frequency of Hispanic/Latino Adults for Each Intake Category at Visit 1 Using the Mediterranean Diet Score and the Modified Mediterranean Diet Score (N=6321)

|              | <b>Mediterranean Diet Score</b>    | <b>Modified Mediterranean Diet Score</b> |
|--------------|------------------------------------|------------------------------------------|
| <b>Score</b> | <b>Weighted Frequency (95% CI)</b> | <b>Weighted Frequency (95% CI)</b>       |
| 0            | 0.04 (0.01-0.2)                    | 0.05 (0.01-0.2)                          |
| 1            | 1.0 (0.7-1.4)                      | 1.0 (0.8-1.3)                            |
| 2            | 5.4 (4.4-6.5)                      | 5.9 (4.9-7.1)                            |
| 3            | 11.7 (10.6-12.8)                   | 11.9 (10.8-13.2)                         |
| 4            | 17.7 (16.4-19.2)                   | 16.2 (14.8-17.6)                         |
| 5            | 23.8 (22.1-25.5)                   | 21.9 (20.4-23.6)                         |
| 6            | 21.7 (20.3-23.1)                   | 22.2 (20.6-24.0)                         |
| 7            | 12.8 (11.6-14.0)                   | 13.4 (12.2-14.8)                         |
| 8            | 5.0 (4.3-5.8)                      | 5.9 (5.1-6.9)                            |
| 9            | 1.0 (0.8-1.3)                      | 1.4 (1.1-1.8)                            |

**eTable 2.** Characteristics of Hispanic or Latino Adults at Visit 1 by Modified Mediterranean Diet Adherence

| Variable                                     | Low adherence group<br>(n = 2020)<br>No. (weighted %) | Moderate adherence group (n = 2741) <sup>a</sup> |         | Moderate adherence group (n = 1560) <sup>a</sup> |         |
|----------------------------------------------|-------------------------------------------------------|--------------------------------------------------|---------|--------------------------------------------------|---------|
|                                              |                                                       | No. (weighted %)                                 | P Value | No. (weighted %)                                 | P value |
| <b>Sociodemographic factors at Visit 1</b>   |                                                       |                                                  |         |                                                  |         |
| Age (years)                                  | 55.8 (55.3-56.4)                                      | 56.3 (55.7-56.8)                                 | .28     | 56.5 (55.8-57.1)                                 | P=.12   |
| Sex                                          |                                                       |                                                  |         |                                                  |         |
| Female                                       | 1312 (59.8)                                           | 1754 (56.3.)                                     | .10     | 1011 (57.8)                                      | .35     |
| Male                                         | 708 (40.2)                                            | 987 (43.7)                                       |         | 549 (42.2)                                       |         |
| Household income                             |                                                       |                                                  |         |                                                  |         |
| <\$20,000                                    | 978 (48.2)                                            | 1278 (46.8)                                      | .52     | 678 (41.5)                                       | .01     |
| \$20,000-50,000                              | 682 (31.3)                                            | 1029 (35.5)                                      | .04     | 630 (38.4)                                       | .002    |
| >\$50,000                                    | 183 (9.8)                                             | 210 (8.7)                                        | .42     | 161 (13.9)                                       | .01     |
| Not reported                                 | 177 (10.8)                                            | 224 (8.9)                                        | .14     | 91 (6.2)                                         | .003    |
| Educational level                            |                                                       |                                                  |         |                                                  |         |
| Less than high school                        | 725 (34.8)                                            | 1108 (35.3)                                      | .83     | 778 (43.6)                                       | .001    |
| Completed high school                        | 505 (23.7)                                            | 580 (21.3)                                       | .15     | 249 (16.8)                                       | .001    |
| More than high school                        | 789 (41.4)                                            | 1043 (43.3)                                      | .36     | 526 (39.0)                                       | .32     |
| Health insurance                             | 1275 (62.6)                                           | 1384 (52.9)                                      | .001    | 770 (53.0)                                       | .001    |
| English as preferred language                | 452 (21.1)                                            | 236 (10.2)                                       | .001    | 100 (7.3)                                        | .001    |
| US born                                      | 313 (13.4)                                            | 170 (5.5)                                        | .001    | 73 (5.0)                                         | .001    |
| <b>Clinical characteristics at Visit 1</b>   |                                                       |                                                  |         |                                                  |         |
| History of hypertension                      | 891 (46.2)                                            | 1028 (41.2)                                      | .02     | 565 (38.7)                                       | .001    |
| History of diabetes                          | 533 (26.5)                                            | 759 (28.2)                                       | .37     | 461 (28.5)                                       | .37     |
| History of stroke or TIA                     | 74 (4.4)                                              | 78 (3.4)                                         | .29     | 37 (2.0)                                         | .002    |
| Cholesterol (mg/dL)                          |                                                       |                                                  |         |                                                  |         |
| Total                                        | 210.2 (207.5-212.9)                                   | 210.2 (207.7-212.7)                              | .99     | 212.5 (208.5-216.5)                              | .36     |
| HDL-C                                        | 50.6 (49.6-51.5)                                      | 49.2 (48.5-49.8)                                 | .02     | 49.9 (48.9-51.0)                                 | .38     |
| LDL-C                                        | 130.9 (128.6-133.3)                                   | 130.9 (128.6-133.2)                              | .98     | 132.0 (128.2-135.8)                              | .65     |
| Kidney function (ml/min/1.73m <sup>2</sup> ) | 98.3 (96.8-99.7)                                      | 101.7 (100.2-103.2)                              | .002    | 103.5 (101.8-105.2)                              | .001    |
| Current or previous smoking                  | 496 (25.6)                                            | 441 (16.8)                                       | .001    | 156 (10.4)                                       | .001    |
| Exercise at goal                             |                                                       |                                                  |         |                                                  |         |
| Moderate (> 150 min/week)                    | 1074 (52.6)                                           | 1526 (54.8)                                      | .30     | 886 (57.2)                                       | .08     |

|                                          |                  |                  |     |                  |      |
|------------------------------------------|------------------|------------------|-----|------------------|------|
| Vigorous (> 75 min/week)                 | 347 (16.8)       | 517 (19.4)       | .11 | 319 (21.9)       | .009 |
| Body mass index (95% CI)                 | 30.2 (29.8-30.6) | 29.8 (29.4-30.1) | .08 | 29.4 (29.1-29.8) | .002 |
| Obesity (BMI ≥30)                        | 930 (44.0)       | 1186 (41.6)      | .25 | 680 (39.9)       | .08  |
| Number of Vascular Risk Factors (95% CI) | 2.2 (2.1-2.2)    | 2.1 (2.0-2.1)    | .03 | 2.0 (1.9-2.1)    | .001 |

Abbreviations: BMI, body mass index (calculated as weight in kilograms divided by height in meters squared); HDL-C, high-density lipoprotein cholesterol; LDL-C, low density lipoprotein cholesterol; TIA, transient ischemic attack; SI conversion factor: To convert HDL-C, LDL-C, and total cholesterol to millimoles per liter, multiply by 0.0259.

<sup>a</sup>P values were calculated using the low adherence group as the reference.

**eTable 3.** Association of Modified Mediterranean Diet Score With Cognitive Performance at Visit 1

| Cognitive Test                | Mean scores (95% CI)              |                                        |                                    | P value for trend | Mean differences, $\beta$ (95% CI)   |                                  |
|-------------------------------|-----------------------------------|----------------------------------------|------------------------------------|-------------------|--------------------------------------|----------------------------------|
|                               | Low adherence group<br>(n = 2020) | Moderate adherence group<br>(n = 2741) | High adherence group<br>(n = 1560) |                   | Moderate vs. low<br>adherence groups | High vs. low adherence<br>groups |
| <b>Test Metrics</b>           |                                   |                                        |                                    |                   |                                      |                                  |
| <b>B-SEVLT-Sum</b>            |                                   |                                        |                                    |                   |                                      |                                  |
| Crude (n=6288)                | 22.32 (21.93-22.70)               | 22.68 (22.34-23.03)                    | 23.61 (23.15-24.07)                | <.001             | 0.37 (-0.11-0.85)                    | 1.29 (0.73-1.86)                 |
| Model 1 <sup>a</sup> (n=6288) | 22.04 (21.68-22.40)               | 22.56 (22.24-22.88)                    | 23.49 (23.03-23.95)                | <.001             | 0.52 (0.08-0.96)                     | 1.44 (0.90-1.99)                 |
| Model 2 <sup>b</sup> (n=6270) | 21.88 (21.56-22.20)               | 22.37 (22.07-22.68)                    | 23.50 (23.08-23.91)                | <.001             | 0.49 (0.10-0.89)                     | 1.64 (1.13-2.14)                 |
| Model 3 <sup>c</sup> (n=5635) | 23.14 (22.43-23.85)               | 23.31 (22.64-23.98)                    | 24.17 (23.42-24.91)                | <.001             | 0.17 (-0.22-0.57)                    | 1.08 (0.54-1.62)                 |
| <b>B-SEVLT-Recall</b>         |                                   |                                        |                                    |                   |                                      |                                  |
| Crude (n=6292)                | 7.99 (7.82-8.16)                  | 8.17 (8.02-8.33)                       | 8.77 (8.54-8.99)                   | <.001             | 0.18 (-0.04-0.41)                    | 0.78 (0.50-1.05)                 |
| Model 1 <sup>a</sup> (n=6292) | 7.86 (7.69-8.03)                  | 8.12 (7.97-8.26)                       | 8.71 (8.49-8.93)                   | <.001             | 0.26 (0.04-0.47)                     | 0.85 (0.59-1.12)                 |
| Model 2 <sup>b</sup> (n=6274) | 7.79 (7.63-7.95)                  | 8.04 (7.89-8.18)                       | 8.72 (8.51-8.93)                   | <.001             | 0.24 (0.04-0.45)                     | 0.94 (0.69-1.18)                 |
| Model 3 <sup>c</sup> (n=5639) | 8.77 (8.36-9.17)                  | 8.87 (8.45-9.30)                       | 9.41 (8.98-9.84)                   | <.001             | 0.11 (-0.10-0.31)                    | 0.63 (0.37-0.89)                 |
| <b>Word fluency</b>           |                                   |                                        |                                    |                   |                                      |                                  |
| Crude (n=6217)                | 18.41 (17.91-18.91)               | 18.67 (18.20-19.97)                    | 19.43 (18.89-19.97)                | .02               | 0.25 (-0.40-0.90)                    | 1.02 (0.31-1.73)                 |
| Model 1 <sup>a</sup> (n=6217) | 18.36 (17.87-18.84)               | 18.66 (18.20-19.11)                    | 19.44 (18.89-19.98)                | .01               | 0.31 (-0.33-0.94)                    | 1.06 (0.35-1.77)                 |
| Model 2 <sup>b</sup> (n=6200) | 18.11 (17.65-18.57)               | 18.36 (17.92-18.79)                    | 19.51 (18.99-20.03)                | <.001             | 0.25 (-0.35-0.85)                    | 1.37 (0.67-2.06)                 |
| Model 3 <sup>c</sup> (n=5584) | 19.82 (18.63-21.01)               | 19.88 (18.76-21.00)                    | 20.66 (19.47-21.86)                | .02               | 0.05 (-0.54-0.64)                    | 0.97 (0.30-1.64)                 |
| <b>DSST</b>                   |                                   |                                        |                                    |                   |                                      |                                  |
| Crude (n=6177)                | 35.33 (34.34-36.33)               | 34.43 (33.57-35.29)                    | 34.81 (33.71-35.90)                | .32               | -0.90 (-2.1-0.27)                    | -0.53 (-1.88-0.82)               |
| Model 1 <sup>a</sup> (n=6177) | 35.00 (34.12-35.89)               | 34.35 (33.50-35.21)                    | 34.86 (33.81-35.90)                | .48               | -0.66 (-1.8-0.45)                    | -0.08(-1.32-1.16)                |
| Model 2 <sup>b</sup> (n=6218) | 34.52 (33.73-35.31)               | 33.74 (32.96-34.52)                    | 35.13 (34.24-36.02)                | .03               | -0.79 (-1.79-0.20)                   | 0.70 (-0.37-1.77)                |
| Model 3 <sup>c</sup> (n=5597) | 42.09 (40.46-43.73)               | 42.05 (40.38-43.71)                    | 42.79 (41.16-44.43)                | .29               | -0.12 (-1.00-0.77)                   | 0.79 (-0.28-1.85)                |

| <b>Z-scored Metrics</b>       |                        |                         |                   |       |                    |                    |
|-------------------------------|------------------------|-------------------------|-------------------|-------|--------------------|--------------------|
| <b>B-SEVLT-Sum</b>            |                        |                         |                   |       |                    |                    |
| Crude (n=6288)                | -0.13 (-0.20-(-)0.06)  | -0.06 (-0.12 -0.0001)   | 0.11 (0.02-0.19)  | <.001 | 0.07 (-0.02-0.15)  | 0.23 (0.13-0.34)   |
| Model 1 <sup>a</sup> (n=6288) | -0.18 (-0.24-(-)0.11)  | -0.08 (-0.14-(-)0.02)   | 0.09 (0.003-0.17) | <.001 | 0.09 (0.02-0.17)   | 0.26 (0.16-0.36)   |
| Model 2 <sup>b</sup> (n=6270) | -0.21 (-0.26-(-)0.15)  | -0.12 (-0.17-(-)0.06)   | 0.09 (0.01-0.16)  | <.001 | 0.09 (0.02-0.16)   | 0.29 (0.20-0.38)   |
| Model 3 <sup>c</sup> (n=5635) | 0.02 (-0.11-0.15)      | 0.05 (-0.07-0.17)       | 0.21 (0.07-0.34)  | <.001 | 0.04 (-0.03-0.11)  | 0.23 (0.12-0.33)   |
| <b>B-SEVLT-Recall</b>         |                        |                         |                   |       |                    |                    |
| Crude (n=6292)                | -0.15 (-0.21-(-)0.09)  | -0.09 (-0.14-(-)0.03)   | 0.12 (0.04-0.20)  | <.001 | 0.06 (-0.01-0.14)  | 0.27 (0.17-0.34)   |
| Model 1 <sup>a</sup> (n=6292) | -0.20 (-0.26-(-)0.14)  | -0.11 (-0.16-(-)0.06)   | 0.10 (0.02-0.18)  | <.001 | 0.09 (0.01-0.17)   | 0.29 (0.20-0.39)   |
| Model 2 <sup>b</sup> (n=6274) | -0.22 (-0.28-(-)0.17)  | -0.14 (-0.19-(-)0.09)   | 0.10 (0.03-0.17)  | <.001 | 0.08 (0.01-0.15)   | 0.33 (0.24-0.41)   |
| Model 3 <sup>c</sup> (n=5639) | 0.12 (-0.02-0.26)      | 0.16 (0.01-0.31)        | 0.34 (0.19-0.50)  | <.001 | 0.05 (-0.03-0.12)  | 0.23 (0.14-0.33)   |
| <b>Word fluency</b>           |                        |                         |                   |       |                    |                    |
| Crude (n=6217)                | -0.02 (-0.09-0.05)     | 0.01 (-0.05-0.08)       | 0.12 (0.04-0.20)  | .02   | 0.04 (-0.05-0.13)  | 0.14 (0.04-0.24)   |
| Model 1 <sup>a</sup> (n=6217) | -0.03 (-0.10-0.04)     | 0.01 (-0.05-0.08)       | 0.12 (0.04-0.20)  | .01   | 0.04 (-0.05-0.13)  | 0.15 (0.05-0.25)   |
| Model 2 <sup>b</sup> (n=6200) | -0.06 (-0.13-(-)0.002) | -0.03 (-0.09-0.03)      | 0.13 (0.06-0.20)  | <.001 | 0.04 (-0.05-0.12)  | 0.19 (0.09-0.29)   |
| Model 3 <sup>c</sup> (n=5584) | 0.17 (0.01-0.34)       | 0.18 (0.03-0.34)        | 0.29 (0.13-0.46)  | .02   | 0.02 (-0.06-0.11)  | 0.15 (0.05-0.25)   |
| <b>DSST</b>                   |                        |                         |                   |       |                    |                    |
| Crude (n=6177)                | 0.06 (-0.01-0.14)      | -0.01 (-0.07-0.06)      | 0.02 (-0.06-0.10) | .32   | -0.07 (-0.16-0.02) | -0.04 (-0.14-0.06) |
| Model 1 <sup>a</sup> (n=6177) | 0.04 (-0.03-0.10)      | -0.01 (-0.08-0.05)      | 0.03 (-0.05-0.10) | .48   | -0.05 (-0.13-0.03) | -0.01 (-0.10-0.09) |
| Model 2 <sup>b</sup> (n=6218) | -0.00003 (-0.06-0.06)  | -0.06 (-0.12-(-)0.0003) | 0.05 (-0.02-0.11) | .03   | -0.06 (-0.14-0.02) | 0.05 (-0.03-0.13)  |
| Model 3 <sup>c</sup> (n=5597) | 0.57 (0.45-0.70)       | 0.57 (0.44-0.69)        | 0.63 (0.50-0.75)  | .29   | 0.001 (-0.07-0.07) | 0.07 (-0.02-0.15)  |
| <b>Global Cognition</b>       |                        |                         |                   |       |                    |                    |
| Crude (n=6308)                | -0.07 (-0.13-(-)0.02)  | -0.05 (-0.10-0.0004)    | 0.09 (0.03-0.15)  | <.001 | 0.02 (-0.04-0.09)  | 0.14 (0.06-0.21)   |
| Model 1 <sup>a</sup> (n=6308) | -0.11 (-0.16-(-)0.05)  | -0.06 (-0.11-(-)0.01)   | 0.08 (0.02-0.14)  | <.001 | 0.05 (-0.01-0.11)  | 0.16 (0.09-0.24)   |
| Model 2 <sup>b</sup> (n=6290) | -0.13 (-0.18-(-)0.09)  | -0.09 (-0.14-(-)0.05)   | 0.09 (0.04-0.14)  | <.001 | 0.03 (-0.02-0.09)  | 0.20 (0.14-0.26)   |
| Model 3 <sup>c</sup> (n=5653) | 0.21 (0.12-0.31)       | 0.23 (0.14-0.33)        | 0.36 (0.26-0.46)  | <.001 | 0.03 (-0.02-0.08)  | 0.16 (0.09-0.23)   |

Abbreviations: B-SEVLT, Brief -Spanish- English Verbal Learning Test; DSST, Digit Symbol Substitution Test.

<sup>a</sup>Adjusted by age and sex.

<sup>b</sup>Adjusted by age, sex, and educational level.

<sup>c</sup>Adjusted by age, sex, educational level, language preference, history of hypertension, history of stroke or transient ischemic attack, current or previous smoking status, health insurance, household income, US born, physical activity, kidney function, body mass index, and number of vascular risk factors.

**eTable 4.** Association of Modified Mediterranean Diet Score With Cognitive Performance at Visit 2

| Cognitive Test                | Mean scores (95% CI)              |                                        |                                    | P value for trend | Mean differences, $\beta$ (95% CI)   |                                  |
|-------------------------------|-----------------------------------|----------------------------------------|------------------------------------|-------------------|--------------------------------------|----------------------------------|
|                               | Low adherence group<br>(n = 2020) | Moderate adherence group<br>(n = 2741) | High adherence group<br>(n = 1560) |                   | Moderate vs. low<br>adherence groups | High vs. low adherence<br>groups |
| <b>Test Metrics</b>           |                                   |                                        |                                    |                   |                                      |                                  |
| <b>B-SEVLT-Sum</b>            |                                   |                                        |                                    |                   |                                      |                                  |
| Crude (n=6298)                | 22.15 (21.73-22.57)               | 22.88 (22.56-23.20)                    | 23.55 (23.15-23.95)                | <.001             | 0.72 (0.24-1.21)                     | 1.40 (0.86-1.93)                 |
| Model 1 <sup>a</sup> (n=6298) | 21.83 (21.44-22.22)               | 22.77 (22.47-23.06)                    | 23.44 (23.05-23.83)                | <.001             | 0.93 (0.48-1.38)                     | 1.61 (1.10-2.12)                 |
| Model 2 <sup>b</sup> (n=6280) | 21.71 (21.34-22.08)               | 22.62 (22.34-22.89)                    | 23.52 (23.16-23.89)                | <.001             | 0.90 (0.48-1.32)                     | 1.81 (1.33-2.30)                 |
| Model 3 <sup>c</sup> (n=5688) | 22.64 (21.76-23.52)               | 23.20 (22.42-23.97)                    | 23.83 (22.95-24.71)                | <.001             | 0.55 (0.15-0.96)                     | 1.20 (0.73-1.67)                 |
| <b>B--SEVLT-Recall</b>        |                                   |                                        |                                    |                   |                                      |                                  |
| Crude (n=6286)                | 7.93 (7.71-8.15)                  | 8.24 (8.08-8.40)                       | 8.65 (8.42-8.87)                   | <.001             | 0.31 (0.05-0.58)                     | 0.72 (0.42-1.02)                 |
| Model 1 <sup>a</sup> (n=6286) | 7.78 (7.58-7.98)                  | 8.19 (8.04-8.35)                       | 8.60 (8.37-8.83)                   | <.001             | 0.41 (0.17-0.65)                     | 0.82 (0.53-1.10)                 |
| Model 2 <sup>b</sup> (n=6268) | 7.74 (7.54-7.93)                  | 8.14 (7.99-8.29)                       | 8.63 (8.41-8.86)                   | <.001             | 0.40 (0.17-0.63)                     | 0.89 (0.61-1.17)                 |
| Model 3 <sup>c</sup> (n=5679) | 8.10 (7.69-8.50)                  | 8.38 (7.95-8.82)                       | 8.75 (8.28-9.21)                   | <.001             | 0.29 (0.06-0.51)                     | 0.66 (0.36-0.95)                 |
| <b>Word fluency</b>           |                                   |                                        |                                    |                   |                                      |                                  |
| Crude (n=6276)                | 18.21 (17.77-18.64)               | 18.07 (17.68-18.46)                    | 18.44 (17.91-18.97)                | .53               | -0.14 (-0.70-0.42)                   | 0.23 (-0.42-0.88)                |
| Model 1 <sup>a</sup> (n=6276) | 18.16 (17.73-18.59)               | 18.09 (17.71-18.48)                    | 18.49 (17.94-19.03)                | .47               | -0.06 (-0.60-0.48)                   | 0.32 (-0.34-0.97)                |
| Model 2 <sup>b</sup> (n=6258) | 18.00 (17.64-18.37)               | 17.90 (17.53-18.27)                    | 18.68 (18.18-19.18)                | .03               | -0.11 (-0.61-0.39)                   | 0.70 (0.10-1.29)                 |
| Model 3 <sup>c</sup> (n=5669) | 20.03 (18.80-21.27)               | 19.99 (18.80-21.17)                    | 20.42 (19.08-21.76)                | .31               | -0.05 (-0.56-0.46)                   | 0.49 (-0.13-1.11)                |
| <b>DSST</b>                   |                                   |                                        |                                    |                   |                                      |                                  |
| Crude (n=6234)                | 32.97 (32.00-33.93)               | 31.97 (31.20-32.75)                    | 32.27 (31.20-33.35)                | .23               | -0.99 (-2.14-0.15)                   | -0.69 (-2.00-0.61)               |
| Model 1 <sup>a</sup> (n=6234) | 32.55 (31.71-33.38)               | 31.98 (31.23-32.72)                    | 32.36 (31.34-33.38)                | .52               | -0.59 (-1.61-0.44)                   | -0.13 (-1.33-1.07)               |
| Model 2 <sup>b</sup> (n=6218) | 32.12 (31.40-32.83)               | 31.44 (30.77-32.11)                    | 32.66 (31.80-33.51)                | .03               | -0.69 (-1.59-0.20)                   | 0.62 (-0.37-1.62)                |
| Model 3 <sup>c</sup> (n=5638) | 38.06 (36.40-39.73)               | 37.98 (36.27-39.70)                    | 38.52 (36.76-40.29)                | .50               | -0.15 (-0.97-0.67)                   | 0.58 (-0.41-1.56)                |
| <b>Z-scored Metrics</b>       |                                   |                                        |                                    |                   |                                      |                                  |
| <b>B-SEVLT-Sum</b>            |                                   |                                        |                                    |                   |                                      |                                  |
| Crude (n=6298)                | -0.16 (-0.23-(-)0.09)             | -0.03 (-0.09-0.02)                     | 0.08 (0.01-0.15)                   | <.001             | 0.12 (0.04-0.21)                     | 0.24 (0.15-0.33)                 |

|                                |                       |                        |                    |       |                    |                    |
|--------------------------------|-----------------------|------------------------|--------------------|-------|--------------------|--------------------|
| Model 1 <sup>a</sup> (n=6298)  | -0.21 (-0.28-(-)0.15) | -0.05 (-0.10-(-)0.002) | 0.06 (-0.004-0.13) | <.001 | 0.16 (0.08-0.24)   | 0.28 (0.19-0.37)   |
| Model 2 <sup>b</sup> (n=6280)  | -0.23 (-0.30-(-)0.17) | -0.08 (-0.13-(-)0.03)  | 0.08 (0.01-0.14)   | <.001 | 0.15 (0.08-0.23)   | 0.31 (0.23-0.40)   |
| Model 3 <sup>c</sup> (n=5688)  | -0.07 (-0.23-0.08)    | 0.02 (-0.11-0.15)      | 0.13 (-0.02-0.28)  | <.001 | 0.10 (0.03-0.17)   | 0.22 (0.14-0.30)   |
| <b>B--SEVLT-Recall</b>         |                       |                        |                    |       |                    |                    |
| Crude (n=6286)                 | -0.16 (-0.24-(-)0.09) | -0.06 (-0.11-(-)0.01)  | 0.08 (0.00-0.15)   | <.001 | 0.10 (0.02-0.19)   | 0.24 (0.14-0.34)   |
| Model 1 <sup>a</sup> (n=6286)  | -0.21 (-0.28-(-)0.15) | -0.08 (-0.13-(-)0.02)  | 0.06 (-0.02-0.14)  | <.001 | 0.14 (0.06-0.22)   | 0.27 (0.18-0.37)   |
| Model 2 <sup>b</sup> (n=6268)  | -0.23 (-0.29-(-)0.16) | -0.09 (-0.14-(-)0.05)  | 0.07 (-0.004-0.15) | <.001 | 0.13 (0.06-0.21)   | 0.29 (0.20-0.39)   |
| Model 3 <sup>c</sup> (n=5679)  | -0.11 (-0.24-0.03)    | -0.01 (-0.16-0.13)     | 0.11 (-0.05-0.27)  | <.001 | 0.09 (0.01-0.17)   | 0.22 (0.12-0.33)   |
| <b>Word fluency</b>            |                       |                        |                    |       |                    |                    |
| Crude (n=6276)                 | 0.02 (-0.04-0.08)     | -0.0004 (-0.05-0.05)   | 0.05 (-0.02-0.12)  | .53   | -0.02 (-0.10-0.06) | 0.03 (-0.06-0.12)  |
| Model 1 <sup>a</sup> (n=6276)  | 0.01 (-0.05-0.07)     | 0.003 (-0.05-0.06)     | 0.06 (-0.02-0.13)  | .47   | -0.01 (-0.08-0.07) | 0.04 (-0.05-0.13)  |
| Model 2 <sup>b</sup> (n=6258)  | -0.01 (-0.06-0.04)    | -0.02 (-0.07-0.03)     | 0.08 (0.01-0.15)   | .03   | -0.02 (-0.08-0.05) | 0.09 (0.02-0.18)   |
| Model 3 <sup>c</sup> (n=5669)  | 0.27 (0.10-0.44)      | 0.26 (0.10-0.42)       | 0.32 (0.14-0.51)   | .31   | 0.01 (-0.07-0.08)  | 0.08 (-0.01-0.17)  |
| <b>DSST</b>                    |                       |                        |                    |       |                    |                    |
| Crude (n=6234)                 | .04 (-0.04-0.11)      | -0.04 (-0.10-0.02)     | -0.02 (-0.10-0.06) | .23   | -0.08 (-0.16-0.01) | -0.05 (-0.15-0.05) |
| Model 1 <sup>a</sup> (n=6234)  | .004 (-0.06-0.07)     | -0.04 (-0.10-0.02)     | -0.01 (-0.09-0.07) | .52   | -0.05 (-0.12-0.03) | -0.01 (-0.10-0.08) |
| Model 2 <sup>b</sup> (n=6218)  | -0.03 (-0.08-0.03)    | -0.08 (-0.13-(-)0.03)  | 0.01 (-0.05-0.08)  | .03   | -0.05 (-0.12-0.02) | 0.04 (-0.03-0.12)  |
| Model 3 <sup>c</sup> (n=5638)  | 0.42 (0.30-0.55)      | 0.42 (0.29-0.55)       | 0.46 (0.32-0.59)   | .50   | -0.01 (-0.07-0.06) | 0.06 (-0.02-0.13)  |
| <b>Global Cognition</b>        |                       |                        |                    |       |                    |                    |
| Crude (n=6298)                 | -0.07 (-0.13-(-)0.01) | -0.04 (-0.08-0.01)     | 0.04 (-0.01-0.10)  | .004  | 0.03 (-0.03-0.10)  | 0.12 (0.05-0.19)   |
| Model 1 <sup>a</sup> (n=62989) | -0.11 (-0.16-(-)0.05) | -0.04 (-0.08-(-)0.003) | 0.04 (-0.02-0.10)  | <.001 | 0.06 (0.002-0.12)  | 0.15 (0.08-0.22)   |
| Model 2 <sup>b</sup> (n=6280)  | -0.13 (-0.17-(-)0.08) | -0.07 (-0.11-(-)0.03)  | 0.06 (0.01-0.11)   | <.001 | 0.06 (0.003-0.11)  | 0.18 (0.13-0.24)   |
| Model 3 <sup>c</sup> (n=5688)  | 0.12 (0.01-0.24)      | 0.17 (0.06-0.27)       | 0.25 (0.13-0.37)   | <.001 | 0.05 (-0.01-0.09)  | 0.14 (0.08-0.21)   |

Abbreviations: B-SEVLT, Brief -Spanish- English Verbal Learning Test; DSST, Digit Symbol Substitution Test.

<sup>a</sup>Adjusted by age and sex.

<sup>b</sup>Adjusted by age, sex, and educational level.

<sup>c</sup>Adjusted by age, sex, educational level, language preference, history of hypertension, history of stroke or transient ischemic attack, current or previous smoking status, health insurance, household income, US born, physical activity, kidney function, body mass index, and number of vascular risk factors.



**eTable 5.** Cognitive Performance Change Between Visits 1 and 2 by Modified Mediterranean Diet Adherence

| Cognitive Test                | Mean scores (95% CI)              |                                        |                                    | P value for trend | Mean differences, $\beta$ (95% CI)   |                                  |
|-------------------------------|-----------------------------------|----------------------------------------|------------------------------------|-------------------|--------------------------------------|----------------------------------|
|                               | Low adherence group<br>(n = 2020) | Moderate adherence group<br>(n = 2741) | High adherence group<br>(n = 1560) |                   | Moderate vs. low<br>adherence groups | High vs. low<br>adherence groups |
| <b>Test Metrics</b>           |                                   |                                        |                                    |                   |                                      |                                  |
| <b>B-SEVLT-Sum</b>            |                                   |                                        |                                    |                   |                                      |                                  |
| Crude (n=6266)                | -.33 (-.64-(-).01)                | .18 (-.08-.44)                         | .31 (-.02-.64)                     | .006              | 0.51 (0.15-0.87)                     | 0.62 (0.19-1.06)                 |
| Model 1 <sup>a</sup> (n=6266) | -.52 (-.83-(-).21)                | .12 (-.13-.38)                         | .33 (.0001-.65)                    | <.001             | 0.64 (0.29-0.99)                     | 0.83 (0.40-1.26)                 |
| Model 2 <sup>b</sup> (n=6248) | -.59 (-.90-(-).28)                | .06 (-.19-.31)                         | .44 (.11-.76)                      | <.001             | 0.65 (0.30-1.0)                      | 1.00 (0.57-1.43)                 |
| Model 3 <sup>c</sup> (n=5628) | -.18 (-1.06-.70)                  | .28 (-.50-1.07)                        | .52 (-.38-1.43)                    | .003              | 0.46 (0.12-0.80)                     | 0.70 (0.27-1.11)                 |
| <b>B--SEVLT-Recall</b>        |                                   |                                        |                                    |                   |                                      |                                  |
| Crude (n=6258)                | -.18 (-.36-.01)                   | .04 (-.09-.18)                         | .13 (-.04-.31)                     | .051              | 0.22 (-0.01-0.45)                    | 0.29 (0.04-0.54)                 |
| Model 1 <sup>a</sup> (n=6258) | -.28 (-.45-(-).10)                | .01 (-.12-.15)                         | .15 (-.03-.34)                     | .002              | 0.29 (0.08-0.50)                     | 0.40 (0.15-0.65)                 |
| Model 2 <sup>b</sup> (n=6240) | -.30 (-.48-(-).12)                | -.01 (-.14-.12)                        | .20 (.01-.38)                      | <.001             | 0.29 (0.08-0.50)                     | 0.46 (0.21-0.71)                 |
| Model 3 <sup>c</sup> (n=5623) | -.31 (-.68-.05)                   | -.07 (-.47-.33)                        | .07 (-.35-.49)                     | .01               | 0.24 (0.03-0.45)                     | 0.39 (0.13-0.65)                 |
| <b>Word fluency</b>           |                                   |                                        |                                    |                   |                                      |                                  |
| Crude (n=6183)                | -.16 (-.53-.22)                   | -.43 (-.68-(-).18)                     | -.74 (-1.08-(-).39)                | .07               | -0.27 (-0.72-0.19)                   | -0.58 (-1.08-(-)0.07)            |
| Model 1 <sup>a</sup> (n=6183) | -.16 (-.53-.21)                   | -.40 (-.65-(-).15)                     | -.67 (-1.02-(-).33)                | .12               | -0.24 (-0.69-0.21)                   | -0.51 (-1.01-(-)0.01)            |
| Model 2 <sup>b</sup> (n=6166) | -.21 (-.56-.13)                   | -.45 (-.71-(-).19)                     | -.55 (-.90-(-).20)                 | .39               | -0.24 (-0.68-0.19)                   | -0.28 (-0.78-0.22)               |
| Model 3 <sup>c</sup> (n=5565) | .56 (-.31-1.42)                   | .48 (-.33-1.30)                        | .29 (-.61-1.19)                    | .53               | -0.07 (-0.51-0.38)                   | -0.25 (-0.77-0.27)               |
| <b>DSST</b>                   |                                   |                                        |                                    |                   |                                      |                                  |
| Crude (n=6093)                | -2.07 (-2.57-(-)1.57)             | -2.22 (-2.62-(-)1.83)                  | -2.43 (-2.88-(-)1.98)              | .54               | -0.15 (-0.80-0.49)                   | -0.35 (-0.99-0.30)               |
| Model 1 <sup>a</sup> (n=6093) | -2.14 (-2.63-(-)1.65)             | -2.24 (-2.62-(-)1.87)                  | -2.38 (-2.82-(-)1.93)              | .77               | -0.12 (-0.73-0.49)                   | -0.23 (-0.88-0.41)               |
| Model 2 <sup>b</sup> (n=6093) | -2.25 (-2.73-(-)1.78)             | -2.42 (-2.80-(-)2.05)                  | -2.34 (-2.79-(-)1.88)              | .85               | -0.18 (-0.78-0.41)                   | -0.09 (-0.71-0.54)               |
| Model 3 <sup>c</sup> (n=5508) | -1.83 (-3.03-(-).64)              | -1.95 (-3.15-(-).75)                   | -2.02 (-3.25-(-).80)               | .84               | -0.13 (-0.75-0.48)                   | -0.20 (-0.83-0.44)               |
| <b>Z-scored Metrics</b>       |                                   |                                        |                                    |                   |                                      |                                  |
| <b>B-SEVLT-Sum</b>            |                                   |                                        |                                    |                   |                                      |                                  |
| Crude (n=6266)                | -0.06 (-0.12-(-)0.01)             | 0.02 (-0.02-0.07)                      | 0.05 (-0.01-0.10)                  | .006              | 0.09 (0.03-0.15)                     | 0.11 (0.03-0.18)                 |

|                               |                       |                      |                     |       |                    |                       |
|-------------------------------|-----------------------|----------------------|---------------------|-------|--------------------|-----------------------|
| Model 1 <sup>a</sup> (n=6266) | -0.10 (-0.15-(-)0.04) | 0.01 (-0.03-0.06)    | 0.05 (-0.01-0.10)   | <.001 | 0.11 (0.05-0.17)   | 0.14 (0.07-0.22)      |
| Model 2 <sup>b</sup> (n=6248) | -0.11 (-0.16-(-)0.05) | 0.0001 (-0.04-0.05)  | 0.07 (0.01-0.12)    | <.001 | 0.11 (0.05-0.17)   | 0.17 (0.10-0.25)      |
| Model 3 <sup>c</sup> (n=5628) | -0.04 (-0.19-0.11)    | 0.04 (-0.09-0.18)    | 0.08 (-0.07-0.24)   | .003  | 0.08 (0.02-0.14)   | 0.12 (0.05-0.19)      |
| <b>B-SEVLT-Recall</b>         |                       |                      |                     |       |                    |                       |
| Crude (n=6258)                | -0.05 (-0.11-0.01)    | 0.02 (-0.03-0.07)    | 0.05 (-0.01-0.11)   | .051  | 0.07 (-0.004-0.15) | 0.10 (0.01-0.18)      |
| Model 1 <sup>a</sup> (n=6258) | -0.09 (-0.14-(-)0.03) | 0.01 (-0.04-0.06)    | 0.06 (-0.01-0.12)   | .002  | 0.10 (0.03-0.17)   | 0.13 (0.05-0.22)      |
| Model 2 <sup>b</sup> (n=6240) | -0.09 (-0.15-(-)0.04) | 0.0001 (-0.04-0.05)  | 0.07 (0.01-0.13)    | <.001 | 0.10 (0.03-0.17)   | 0.15 (0.07-0.24)      |
| Model 3 <sup>c</sup> (n=5623) | -0.10 (-0.22-0.02)    | -0.02 (-0.15-0.11)   | 0.03 (-0.11-0.17)   | .01   | 0.08 (0.01-0.15)   | 0.13 (0.04-0.22)      |
| <b>Word fluency</b>           |                       |                      |                     |       |                    |                       |
| Crude (n=6183)                | 0.05 (0.001-0.10)     | 0.01 (-0.03-0.04)    | -0.03 (-0.08-0.01)  | .07   | -0.04 (-0.10-0.03) | -0.08 (-0.15-(-)0.01) |
| Model 1 <sup>a</sup> (n=6183) | 0.05 (0.0001-0.10)    | 0.01 (-0.02-0.05)    | -0.02 (-0.07-0.02)  | .12   | -0.03 (-0.09-0.03) | -0.07 (-0.14-0.0001)  |
| Model 2 <sup>b</sup> (n=6166) | 0.04 (-0.01-0.09)     | 0.01 (-0.03-0.04)    | -0.01 (-0.06-0.04)  | .39   | -0.03 (-0.09-0.03) | -0.04 (-0.11-0.03)    |
| Model 3 <sup>c</sup> (n=5565) | 0.14 (0.03-0.26)      | 0.13 (0.02-0.25)     | 0.11 (-0.02-0.23)   | .53   | -0.01 (-0.07-0.05) | -0.03 (-0.11-0.04)    |
| <b>DSST</b>                   |                       |                      |                     |       |                    |                       |
| Crude (n=6093)                | 0.001 (-0.04-0.03)    | -0.02 (-0.04-0.01)   | -0.03 (-0.06-0.001) | .54   | -0.01 (-0.06-0.04) | -0.03 (-0.08-0.02)    |
| Model 1 <sup>a</sup> (n=6093) | -0.01 (-0.05-0.03)    | -0.02 (-0.04-0.01)   | -0.03 (-0.06-0.01)  | .77   | -0.01 (-0.06-0.04) | -0.02 (-0.07-0.03)    |
| Model 2 <sup>b</sup> (n=6093) | -0.02 (-0.05-0.02)    | -0.03 (-0.06-0.0001) | -0.02 (-0.06-0.01)  | .85   | -0.01 (-0.06-0.03) | -0.01 (-0.05-0.04)    |
| Model 3 <sup>c</sup> (n=5508) | 0.01 (-0.08-0.10)     | 0.01 (-0.09-0.10)    | 0.0001 (-0.09-0.09) | .84   | -0.01 (-0.06-0.04) | -0.02 (-0.06-0.03)    |
| <b>Global Cognition</b>       |                       |                      |                     |       |                    |                       |
| Crude (n=6285)                | -0.01 (-0.04-0.03)    | 0.01 (-0.02-0.03)    | -0.02 (-0.05-0.01)  | .44   | 0.02 (-0.03-0.06)  | -0.01 (-0.06-0.03)    |
| Model 1 <sup>a</sup> (n=6285) | -0.02 (-0.06-0.01)    | 0.0001 (-0.02-0.03)  | -0.01 (-0.04-0.02)  | .38   | 0.03 (-0.01-0.07)  | 0.01 (-0.03-0.06)     |
| Model 2 <sup>b</sup> (n=6267) | -0.03 (-0.06-0.0001)  | 0.0001 (-0.03-0.02)  | 0.01 (-0.02-0.04)   | .17   | 0.03 (-0.01-0.07)  | 0.04 (-0.01-0.08)     |
| Model 3 <sup>c</sup> (n=5645) | 0.01 (-0.08-0.10)     | 0.04 (-0.05-0.13)    | 0.04 (-0.06-0.14)   | .25   | 0.03 (-0.01-0.07)  | 0.03 (-0.02-0.08)     |

Abbreviations: B-SEVLT, Brief -Spanish- English Verbal Learning Test; DSST, Digit Symbol Substitution Test.

<sup>a</sup>Adjusted by age and sex.

<sup>b</sup>Adjusted by age, sex, and educational level.

<sup>c</sup>Adjusted by age, sex, educational level, language preference, history of hypertension, history of stroke or transient ischemic attack, current or previous smoking status, health insurance, household income, US born, physical activity, kidney function, body mass index, and number of vascular risk factors.
